# Supplementary material
Source: MDPI journal article supplement (https://www.mdpi.com/1999-4923/12/9/818)

# checkCIF/PLATON report

You have not supplied any structure factors. As a result the full set of tests cannot be run.

THIS REPORT IS FOR GUIDANCE ONLY. IF USED AS PART OF A REVIEW PROCEDURE FOR PUBLICATION, IT SHOULD NOT REPLACE THE EXPERTISE OF AN EXPERIENCED CRYSTALLOGRAPHIC REFEREE.

No syntax errors found.      CIF dictionary      Interpreting this report

## Datablock: preex6

---

Bond precision:    C-C = 0.0030 A

Wavelength=0.71073

Cell:                a=5.3818(3)                b=11.4336(6)                c=13.2901(9)  
                      alpha=78.196(5)        beta=80.618(5)        gamma=77.435(5)  
Temperature:        293 K

|                | Calculated            | Reported        |
|----------------|-----------------------|-----------------|
| Volume         | 775.29(8)             | 775.28(8)       |
| Space group    | P -1                  | P-1             |
| Hall group     | -P 1                  | ?               |
| Moiety formula | C8 H10 N2 S, C5 H8 O4 | ?               |
| Sum formula    | C13 H18 N2 O4 S       | C13 H18 N2 O4 S |
| Mr             | 298.35                | 298.35          |
| Dx,g cm-3      | 1.278                 | 1.278           |
| Z              | 2                     | 2               |
| Mu (mm-1)      | 0.222                 | 0.222           |
| F000           | 316.0                 | 316.0           |
| F000'          | 316.40                |                 |
| h,k,lmax       | 6,13,15               | 6,13,15         |
| Nref           | 2744                  | 2739            |
| Tmin,Tmax      | 0.943,0.954           | 0.941,1.000     |
| Tmin'          | 0.895                 |                 |

Correction method= # Reported T Limits: Tmin=0.941 Tmax=1.000  
AbsCorr = MULTI-SCAN

Data completeness= 0.998

Theta(max)= 25.030

R(reflections)= 0.0448( 2132)

wR2(reflections)= 0.1236( 2739)

S = 1.043

Npar= 238

---

The following ALERTS were generated. Each ALERT has the format

**test-name\_ALERT\_alert-type\_alert-level.**

Click on the hyperlinks for more details of the test.

---

 **Alert level B**  
 PLAT213\_ALERT\_2\_B Atom C7A has ADP max/min Ratio ..... 4.2 prolat

**Author Response: strong disorder of rotation around C1-C2**

---

 **Alert level C**  
 PLAT213\_ALERT\_2\_C Atom C8B has ADP max/min Ratio ..... 3.1 prolat

**Author Response: strong disorder of rotation around C1-C2**

PLAT220\_ALERT\_2\_C Non-Solvent Resd 1 C Ueq(max)/Ueq(min) Range 4.2 Ratio

**Author Response: strong disorder of rotation around C1-C2**

PLAT222\_ALERT\_3\_C Non-Solvent Resd 1 H Uiso(max)/Uiso(min) Range 4.8 Ratio

**Author Response: strong disorder of rotation around C1-C2**

PLAT242\_ALERT\_2\_C Low 'MainMol' Ueq as Compared to Neighbors of C9 Check  
 PLAT250\_ALERT\_2\_C Large U3/U1 Ratio for Average U(i,j) Tensor .... 3.1 Note

**Author Response: strong disorder of rotation around C1-C2**

PLAT250\_ALERT\_2\_C Large U3/U1 Ratio for Average U(i,j) Tensor .... 3.6 Note

**Author Response: strong disorder of rotation around C1-C2**

PLAT414\_ALERT\_2\_C Short Intra D-H..H-X H1A .. H6B .. 1.93 Ang.

---

 **Alert level G**  
 PLAT002\_ALERT\_2\_G Number of Distance or Angle Restraints on AtSite 14 Note  
 PLAT005\_ALERT\_5\_G No Embedded Refinement Details found in the CIF Please Do !  
 PLAT007\_ALERT\_5\_G Number of Unrefined Donor-H Atoms ..... 4 Report  
 PLAT093\_ALERT\_1\_G No s.u.'s on H-positions, Refinement Reported as mixed Check  
 PLAT154\_ALERT\_1\_G The s.u.'s on the Cell Angles are Equal ..(Note) 0.005 Degree  
 PLAT199\_ALERT\_1\_G Reported \_cell\_measurement\_temperature ..... (K) 293 Check  
 PLAT200\_ALERT\_1\_G Reported \_diffrn\_ambient\_temperature ..... (K) 293 Check  
 PLAT301\_ALERT\_3\_G Main Residue Disorder .....(Resd 1).. 55 % Note  
 PLAT720\_ALERT\_4\_G Number of Unusual/Non-Standard Labels ..... 10 Note  
 PLAT779\_ALERT\_4\_G Suspect or Irrelevant (Bond) Angle in CIF .... # 10 Check  
     C4A -N2 -C4B 1.555 1.555 1.555 16.40 Deg.  
 PLAT779\_ALERT\_4\_G Suspect or Irrelevant (Bond) Angle in CIF .... # 11 Check  
     C5A -N2 -C5B 1.555 1.555 1.555 21.30 Deg.  
 PLAT779\_ALERT\_4\_G Suspect or Irrelevant (Bond) Angle in CIF .... # 16 Check  
     C3A -C2 -C3B 1.555 1.555 1.555 16.00 Deg.

|                   |                                                  |       |       |
|-------------------|--------------------------------------------------|-------|-------|
| PLAT779_ALERT_4_G | Suspect or Irrelevant (Bond) Angle in CIF .... # | 17    | Check |
|                   | C6B -C2 -C6A 1.555 1.555 1.555                   | 19.30 | Deg.  |
| PLAT811_ALERT_5_G | No ADDSYM Analysis: Too Many Excluded Atoms .... | !     | Info  |
| PLAT860_ALERT_3_G | Number of Least-Squares Restraints .....         | 25    | Note  |
| PLAT899_ALERT_4_G | SHELXL97 is Deprecated and Succeeded by SHELXL   | 2014  | Note  |

---

0 **ALERT level A** = Most likely a serious problem - resolve or explain  
1 **ALERT level B** = A potentially serious problem, consider carefully  
7 **ALERT level C** = Check. Ensure it is not caused by an omission or oversight  
16 **ALERT level G** = General information/check it is not something unexpected

4 ALERT type 1 CIF construction/syntax error, inconsistent or missing data  
8 ALERT type 2 Indicator that the structure model may be wrong or deficient  
3 ALERT type 3 Indicator that the structure quality may be low  
6 ALERT type 4 Improvement, methodology, query or suggestion  
3 ALERT type 5 Informative message, check

---

## Validation response form

Please find below a validation response form (VRF) that can be filled in and pasted into your CIF.

```
# start Validation Reply Form
_vrf_PLAT242_preex6
;
PROBLEM: Low      'MainMol' Ueq as Compared to Neighbors of      C9 Check
RESPONSE: ...
;
_vrf_PLAT414_preex6
;
PROBLEM: Short Intra D-H..H-X      H1A      ..  H6B      ..      1.93 Ang.
RESPONSE: ...
;
# end Validation Reply Form
```

---

It is advisable to attempt to resolve as many as possible of the alerts in all categories. Often the minor alerts point to easily fixed oversights, errors and omissions in your CIF or refinement strategy, so attention to these fine details can be worthwhile. In order to resolve some of the more serious problems it may be necessary to carry out additional measurements or structure refinements. However, the purpose of your study may justify the reported deviations and the more serious of these should normally be commented upon in the discussion or experimental section of a paper or in the "special\_details" fields of the CIF. checkCIF was carefully designed to identify outliers and unusual parameters, but every test has its limitations and alerts that are not important in a particular case may appear. Conversely, the absence of alerts does not guarantee there are no aspects of the results needing attention. It is up to the individual to critically assess their own results and, if necessary, seek expert advice.

### **Publication of your CIF in IUCr journals**

A basic structural check has been run on your CIF. These basic checks will be run on all CIFs submitted for publication in IUCr journals (*Acta Crystallographica*, *Journal of Applied Crystallography*, *Journal of Synchrotron Radiation*); however, if you intend to submit to *Acta Crystallographica Section C* or *E* or *IUCrData*, you should make sure that full publication checks are run on the final version of your CIF prior to submission.

### **Publication of your CIF in other journals**

Please refer to the *Notes for Authors* of the relevant journal for any special instructions relating to CIF submission.

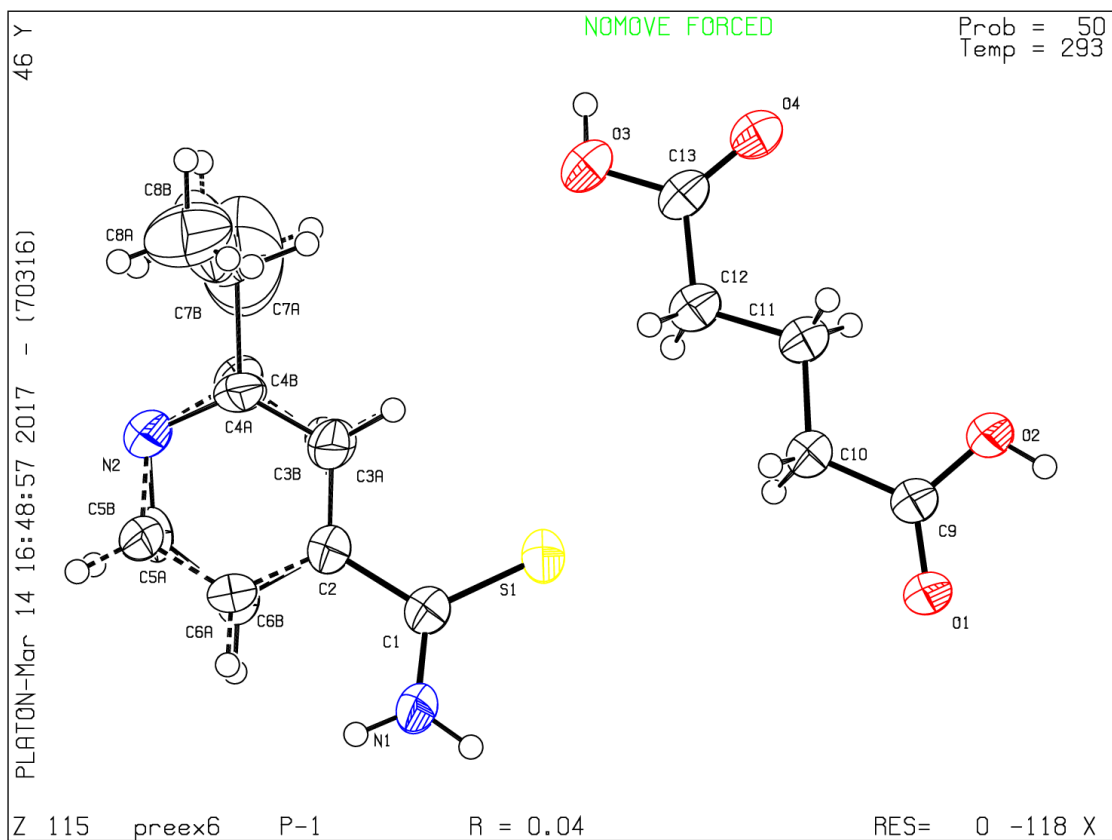

Supplement: s1 [file s1]
