# Supplementary material for: Molecular Crystal Forms of Antitubercular Ethionamide with Dicarboxylic Acids: Solid-State Properties and a Combined Structural and Spectroscopic Study
Source: MDPI journal article supplement (doi:10.3390/pharmaceutics12090818), 2020-08-28
Supplement: s1 [file s1]

# Supplementary Materials: Molecular Crystal Forms of Antitubercular Ethionamide with Dicarboxylic Acids: Solid-State Properties and a Combined Structural and Spectroscopic Study

Simone Bordignon, Paolo Cerreia Vioglio, Elena Amadio, Federica Rossi, Emanuele Priola, Dario Voinovich, Roberto Gobetto and Michele R. Chierotti

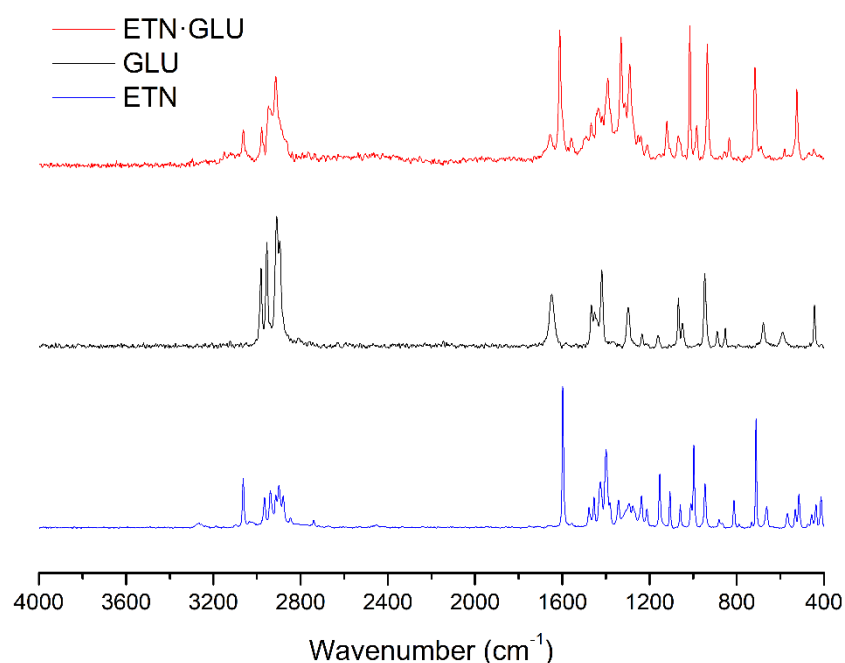

**Figure S1.** Comparison among Raman spectra of ETN (blue), GLU (black) and ETN·GLU (red).

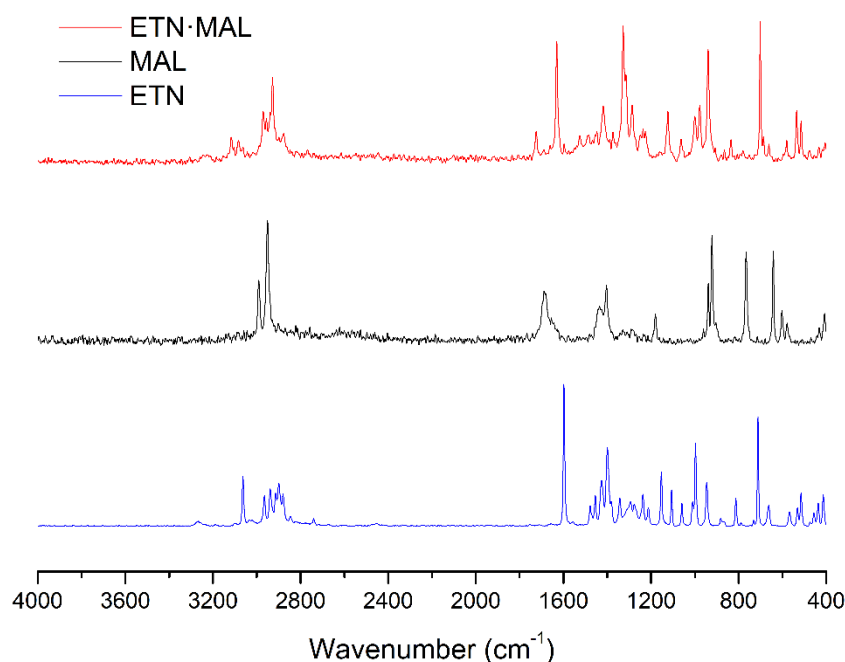

**Figure S2.** Comparison among Raman spectra of ETN (blue), MAL (black) and ETN·MAL (red).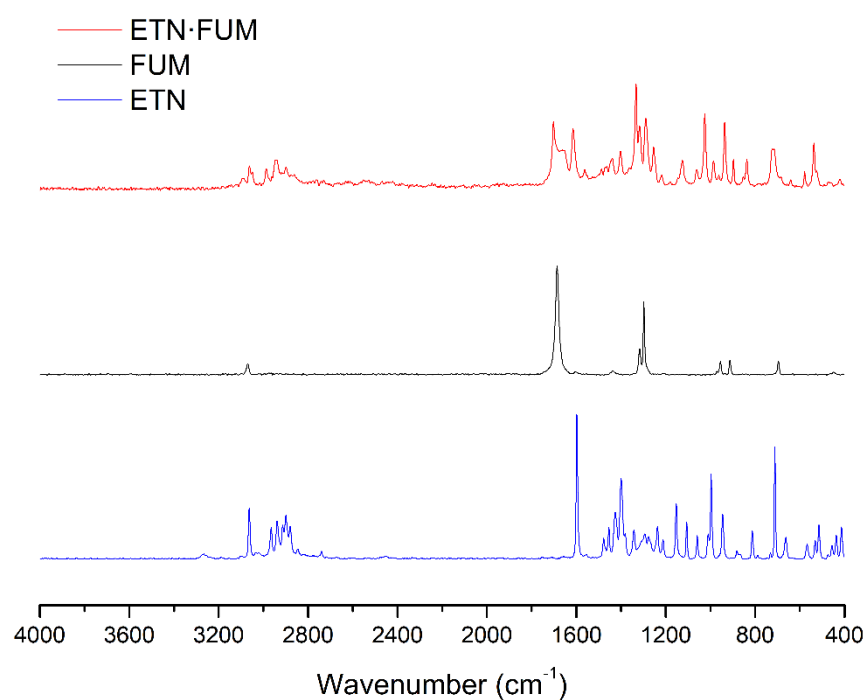**Figure S3.** Comparison among Raman spectra of ETN (blue), FUM (black) and ETN·FUM (red).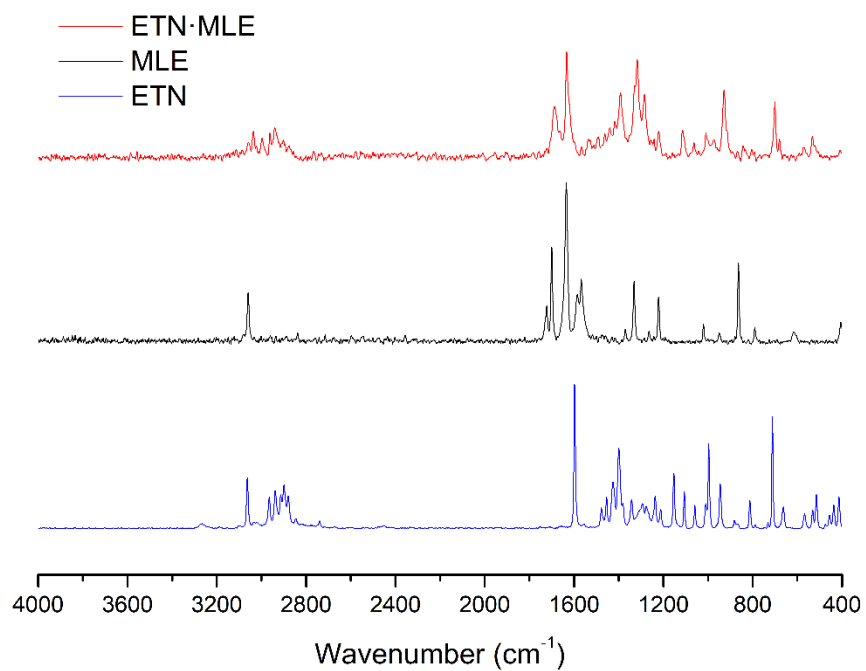**Figure S4.** Comparison among Raman spectra of ETN (blue), MLE (black) and ETN·MLE (red).

**Table S1.** Values of distances between atoms in ETN·GLU X-ray structure. Refer to Scheme 1 in Main Text for atom numeration.

| Atom | Atom | Length/Å  | Atom | Atom | Length/Å  |
|------|------|-----------|------|------|-----------|
| C4A  | N5   | 1.345(12) | N5   | C6B  | 1.358(13) |
| C4A  | C3A  | 1.365(14) | C2   | C7B  | 1.371(13) |
| C4A  | C8A  | 1.561(11) | C2   | C3A  | 1.377(13) |
| S11  | C1   | 1.661(2)  | C2   | C3B  | 1.392(13) |
| O8'  | C5'  | 1.217(2)  | C2   | C7A  | 1.407(12) |
| O9'  | C5'  | 1.316(2)  | C2   | C1   | 1.494(3)  |
| N10  | C1   | 1.308(3)  | C3'  | C4'  | 1.504(3)  |
| O6'  | C1'  | 1.203(3)  | C7A  | C6A  | 1.381(14) |
| C2'  | C1'  | 1.490(3)  | C8A  | C9A  | 1.479(17) |
| C2'  | C3'  | 1.506(3)  | C3B  | C4B  | 1.391(14) |
| O7'  | C1'  | 1.294(3)  | C4B  | C8B  | 1.624(17) |
| C5'  | C4'  | 1.489(3)  | C7B  | C6B  | 1.368(14) |
| N5   | C6A  | 1.330(12) | C8B  | C9B  | 1.438(17) |
| N5   | C4B  | 1.354(14) |      |      |           |

**Table S2.** Values of angles among atoms in ETN·GLU X-ray structure. Refer to Scheme 1 in Main Text for atom numeration.

| Atom | Atom | Atom | Angle/°    | Atom | Atom | Atom | Angle/°    |
|------|------|------|------------|------|------|------|------------|
| N5   | C4A  | C3A  | 126.8(11)  | C3B  | C2   | C1   | 123.4(7)   |
| N5   | C4A  | C8A  | 112.0(9)   | C7A  | C2   | C1   | 119.3(7)   |
| C3A  | C4A  | C8A  | 120.5(10)  | C4'  | C3'  | C2'  | 111.33(18) |
| C1'  | C2'  | C3'  | 117.35(18) | C5'  | C4'  | C3'  | 114.18(18) |
| O8'  | C5'  | O9'  | 122.6(2)   | N10  | C1   | C2   | 116.23(18) |
| O8'  | C5'  | C4'  | 124.03(19) | N10  | C1   | S11  | 122.23(16) |
| O9'  | C5'  | C4'  | 113.34(19) | C2   | C1   | S11  | 121.54(15) |
| C6A  | N5   | C4A  | 112.9(7)   | O6'  | C1'  | O7'  | 122.5(2)   |
| C6A  | N5   | C4B  | 116.3(9)   | O6'  | C1'  | C2'  | 122.02(19) |
| C4A  | N5   | C4B  | 16.4(13)   | O7'  | C1'  | C2'  | 115.47(19) |
| C6A  | N5   | C6B  | 21.3(14)   | C4A  | C3A  | C2   | 116.0(12)  |
| C4A  | N5   | C6B  | 114.4(8)   | N5   | C6A  | C7A  | 128.8(11)  |
| C4B  | N5   | C6B  | 124.0(10)  | C9A  | C8A  | C4A  | 109.9(10)  |
| C7B  | C2   | C3A  | 114.9(10)  | C4B  | C3B  | C2   | 126.4(13)  |
| C7B  | C2   | C3B  | 112.8(10)  | N5   | C4B  | C3B  | 114.4(13)  |
| C3A  | C2   | C3B  | 16.0(10)   | N5   | C4B  | C8B  | 121.5(13)  |
| C7B  | C2   | C7A  | 19.3(13)   | C3B  | C4B  | C8B  | 123.7(13)  |
| C3A  | C2   | C7A  | 122.2(10)  | C2   | C7B  | C6B  | 124.6(14)  |
| C3B  | C2   | C7A  | 114.6(10)  | N5   | C6B  | C7B  | 117.6(14)  |
| C7B  | C2   | C1   | 123.7(7)   | C9B  | C8B  | C4B  | 90.2(16)   |
| C3A  | C2   | C1   | 118.5(7)   |      |      |      |            |

**Table S3.** Values of distances between atoms in ETN·MAL X-ray structure. Refer to Scheme 1 in Main Text for atom numeration.

| Atom | Atom | Length/Å | Atom | Atom | Length/Å |
|------|------|----------|------|------|----------|
| S11  | C1   | 1.656(2) | C8   | C4   | 1.500(3) |
| N5   | C4   | 1.338(3) | C8   | C9   | 1.506(4) |
| N5   | C6   | 1.338(3) | O5'  | C3'  | 1.234(3) |
| N10  | C1   | 1.314(3) | O4'  | C3'  | 1.264(3) |
| C6   | C7   | 1.373(3) | O7'  | C1'  | 1.327(3) |
| C3   | C4   | 1.381(3) | O6'  | C1'  | 1.198(3) |
| C3   | C2   | 1.390(3) | C2'  | C1'  | 1.497(3) |
| C7   | C2   | 1.381(3) | C2'  | C3'  | 1.530(3) |
| C2   | C1   | 1.495(3) |      |      |          |

**Table S4.** Values of angles among atoms in ETN·MAL X-ray structure. Refer to Scheme 1 in Main Text for atom numeration.

| Atom | Atom | Atom | Angle/°    | Atom | Atom | Atom | Angle/°    |
|------|------|------|------------|------|------|------|------------|
| C4   | N5   | C6   | 122.91(18) | N5   | C4   | C3   | 118.3(2)   |
| N5   | C6   | C7   | 120.3(2)   | N5   | C4   | C8   | 118.75(19) |
| C4   | C3   | C2   | 120.5(2)   | C3   | C4   | C8   | 123.0(2)   |
| C6   | C7   | C2   | 119.2(2)   | C1'  | C2'  | C3'  | 114.00(18) |
| C7   | C2   | C3   | 118.85(19) | O5'  | C3'  | O4'  | 124.50(19) |
| C7   | C2   | C1   | 121.29(19) | O5'  | C3'  | C2'  | 117.23(19) |
| C3   | C2   | C1   | 119.9(2)   | O4'  | C3'  | C2'  | 118.26(18) |
| C4   | C8   | C9   | 112.5(2)   | O6'  | C1'  | O7'  | 124.1(2)   |
| N10  | C1   | C2   | 116.21(19) | O6'  | C1'  | C2'  | 124.3(2)   |
| N10  | C1   | S11  | 124.06(16) | O7'  | C1'  | C2'  | 111.6(2)   |
| C2   | C1   | S11  | 119.73(15) |      |      |      |            |

**Table S5.** Values of distances between atoms in ETN·TAR X-ray structure. Refer to Scheme 1 in Main Text for atom numeration.

| Atom  | Atom | Length/Å | Atom | Atom | Length/Å  |
|-------|------|----------|------|------|-----------|
| S11   | C1   | 1.667(4) | C3A  | C4A  | 1.386(6)  |
| S11A  | C1A  | 1.666(4) | C3   | C4   | 1.391(6)  |
| O5A'  | C1A' | 1.259(4) | C2A' | C3A' | 1.533(6)  |
| O10A' | C3A' | 1.422(5) | C2A' | C1A' | 1.532(6)  |
| O7A'  | C4A' | 1.187(5) | C4   | C8   | 1.503(6)  |
| N5    | C4   | 1.329(5) | C4A' | C3A' | 1.521(6)  |
| N5    | C6   | 1.335(5) | C6A  | C7A  | 1.367(6)  |
| N5A   | C6A  | 1.327(5) | C6   | C7   | 1.369(6)  |
| N5A   | C4A  | 1.342(5) | C4A  | C8A  | 1.517(6)  |
| N10   | C1   | 1.304(4) | C8A  | C9A  | 1.438(10) |
| O8A'  | C4A' | 1.327(5) | C8   | C9   | 1.465(10) |
| C2    | C1   | 1.503(6) | O7'  | C4'  | 1.209(5)  |
| C2    | C3   | 1.377(5) | O6'  | C1'  | 1.292(4)  |
| C2    | C7   | 1.391(5) | O3'  | C2'  | 1.405(5)  |
| O9A'  | C2A' | 1.409(4) | O8'  | C4'  | 1.327(5)  |
| C2A   | C1A  | 1.503(6) | O5'  | C1'  | 1.213(4)  |
| C2A   | C3A  | 1.378(5) | C1'  | C2'  | 1.523(6)  |
| C2A   | C7A  | 1.381(5) | C4'  | C3'  | 1.511(6)  |
| O6A'  | C1A' | 1.227(4) | O10' | C3'  | 1.396(5)  |
| C1A   | N10A | 1.301(4) | C2'  | C3'  | 1.541(6)  |

**Table S6.** Values of angles among atoms in ETN·TAR X-ray structure. Refer to Scheme 1 in Main Text for atom numeration.

| Atom | Atom | Atom | Angle/°  | Atom  | Atom | Atom | Angle/°  |
|------|------|------|----------|-------|------|------|----------|
| C4   | N5   | C6   | 120.1(4) | O10A' | C3A' | C2A' | 111.4(3) |
| C6A  | N5A  | C4A  | 121.5(4) | O10A' | C3A' | C4A' | 108.1(3) |
| C3   | C2   | C1   | 120.0(3) | C4A'  | C3A' | C2A' | 109.3(3) |
| C3   | C2   | C7   | 117.8(4) | N5    | C6   | C7   | 122.5(4) |
| C7   | C2   | C1   | 122.2(3) | C6A   | C7A  | C2A  | 119.2(4) |
| C3A  | C2A  | C1A  | 120.5(3) | C6    | C7   | C2   | 118.9(4) |
| C3A  | C2A  | C7A  | 117.7(4) | O5A'  | C1A' | C2A' | 114.8(3) |
| C7A  | C2A  | C1A  | 121.8(3) | O6A'  | C1A' | O5A' | 127.3(4) |
| C2A  | C1A  | S11A | 120.4(2) | O6A'  | C1A' | C2A' | 117.9(4) |
| N10A | C1A  | S11A | 122.8(4) | N5A   | C4A  | C3A  | 118.0(4) |
| N10A | C1A  | C2A  | 116.8(3) | N5A   | C4A  | C8A  | 118.2(4) |
| N10  | C1   | S11  | 122.7(3) | C3A   | C4A  | C8A  | 123.8(4) |
| N10  | C1   | C2   | 116.8(3) | C9A   | C8A  | C4A  | 112.4(6) |
| C2   | C1   | S11  | 120.5(3) | C9    | C8   | C4   | 111.4(6) |
| C2A  | C3A  | C4A  | 121.7(4) | O6'   | C1'  | C2'  | 112.4(3) |
| C2   | C3   | C4   | 120.7(4) | O5'   | C1'  | O6'  | 124.5(4) |
| O9A' | C2A' | C3A' | 110.1(3) | O5'   | C1'  | C2'  | 123.1(3) |
| O9A' | C2A' | C1A' | 112.7(3) | O7'   | C4'  | O8'  | 124.7(4) |
| C1A' | C2A' | C3A' | 110.2(3) | O7'   | C4'  | C3'  | 123.8(4) |
| N5   | C4   | C3   | 120.1(3) | O8'   | C4'  | C3'  | 111.4(4) |
| N5   | C4   | C8   | 117.5(4) | O3'   | C2'  | C1'  | 109.4(3) |
| C3   | C4   | C8   | 122.4(4) | O3'   | C2'  | C3'  | 111.4(3) |
| O7A' | C4A' | O8A' | 124.4(4) | C1'   | C2'  | C3'  | 107.9(3) |
| O7A' | C4A' | C3A' | 126.3(4) | C4'   | C3'  | C2'  | 109.1(3) |
| O8A' | C4A' | C3A' | 109.3(4) | O10'  | C3'  | C4'  | 111.5(3) |
| N5A  | C6A  | C7A  | 121.8(4) | O10'  | C3'  | C2'  | 112.1(4) |

**Table S7.** NMR parameters employed for all SSNMR experiments.

|                       | <sup>13</sup> C CPMAS spectra |      |      |       |      |         |         |         |         |
|-----------------------|-------------------------------|------|------|-------|------|---------|---------|---------|---------|
|                       | ETN                           | GLU  | MAL  | FUM   | MLE  | ETN·GLU | ETN·MAL | ETN·FUM | ETN·MLE |
| n° scans              | 216                           | 24   | 48   | 24    | 4    | 170     | 1184    | 609     | 50      |
| relaxation delay (s)  | 2.8                           | 73   | 50   | 211.2 | 360  | 4.8     | 1.8     | 2.5     | 9.7     |
| contact time (ms)     | 3                             | 3    | 3    | 3     | 5    | 3       | 3       | 3       | 3       |
| acquisition time (ms) | 32                            | 32   | 55   | 32    | 30   | 32      | 35      | 35      | 32      |
| n° points             | 2348                          | 2348 | 3672 | 2348  | 2722 | 2348    | 2568    | 2568    | 2348    |
| spectral width (kHz)  | 36.8                          | 37   | 36.8 | 36.8  | 45   | 36.8    | 36.8    | 36.8    | 36.8    |
|                       | <sup>15</sup> N CPMAS spectra |      |      |       |      |         |         |         |         |
|                       | ETN                           | GLU  | MAL  | FUM   | MLE  | ETN·GLU | ETN·MAL | ETN·FUM | ETN·MLE |
| n° scans              | 19932                         | /    | /    | /     | /    | 1937    | 531     | 21932   | 5892    |
| relaxation delay (s)  | 2.8                           | /    | /    | /     | /    | 4.8     | 1.8     | 2.5     | 9.7     |
| contact time (ms)     | 4                             | /    | /    | /     | /    | 4       | 4       | 3       | 4       |
| acquisition time (ms) | 39                            | /    | /    | /     | /    | 39      | 39      | 39      | 39      |
| n° points             | 2048                          | /    | /    | /     | /    | 2048    | 2048    | 2048    | 2048    |
| spectral width (kHz)  | 26.3                          | /    | /    | /     | /    | 26.3    | 26.3    | 26.3    | 26.3    |

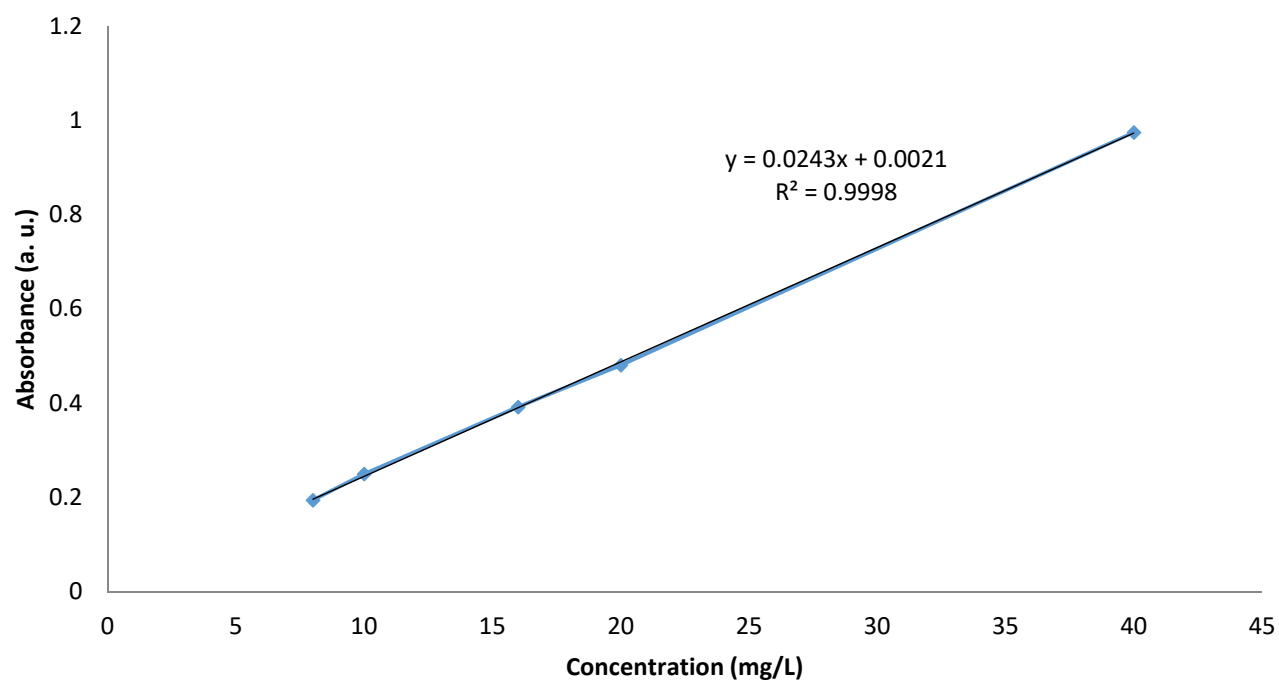

**Figure S5.** Calibration curve for dissolution kinetic tests with correspondent equation for ETN.

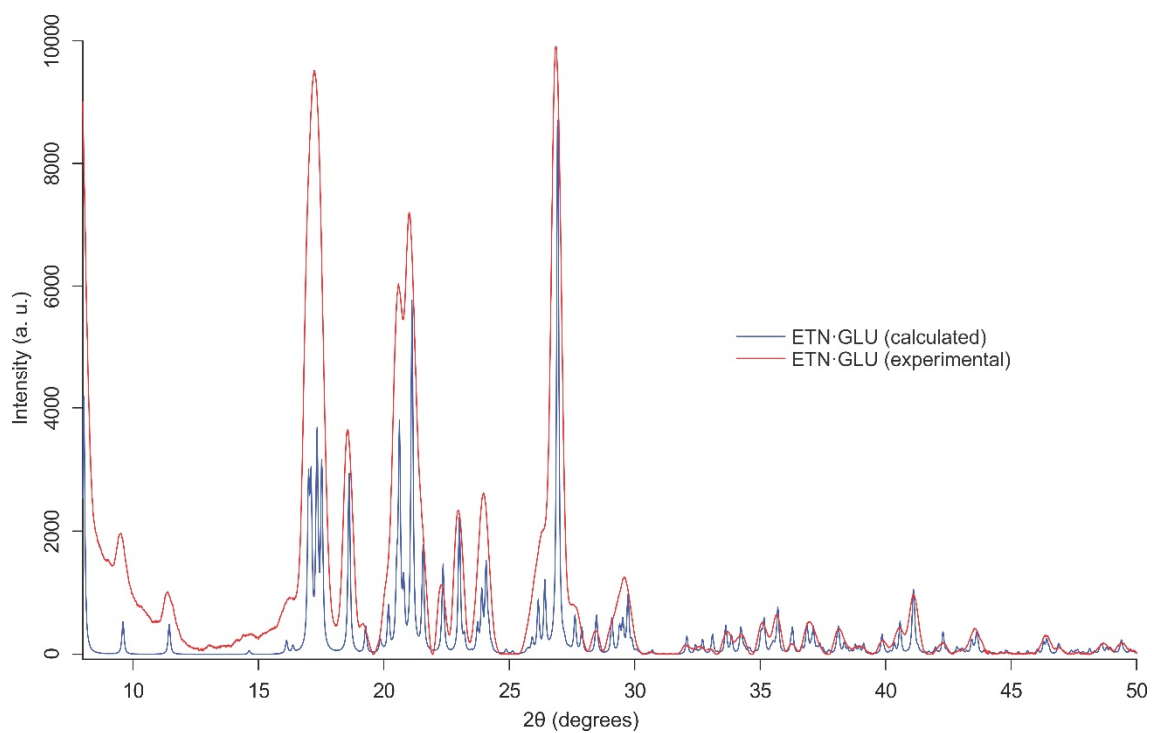

**Figure S6.** Comparison between calculated (blue) and experimental (red) PXRD patterns for ETN·GLU.

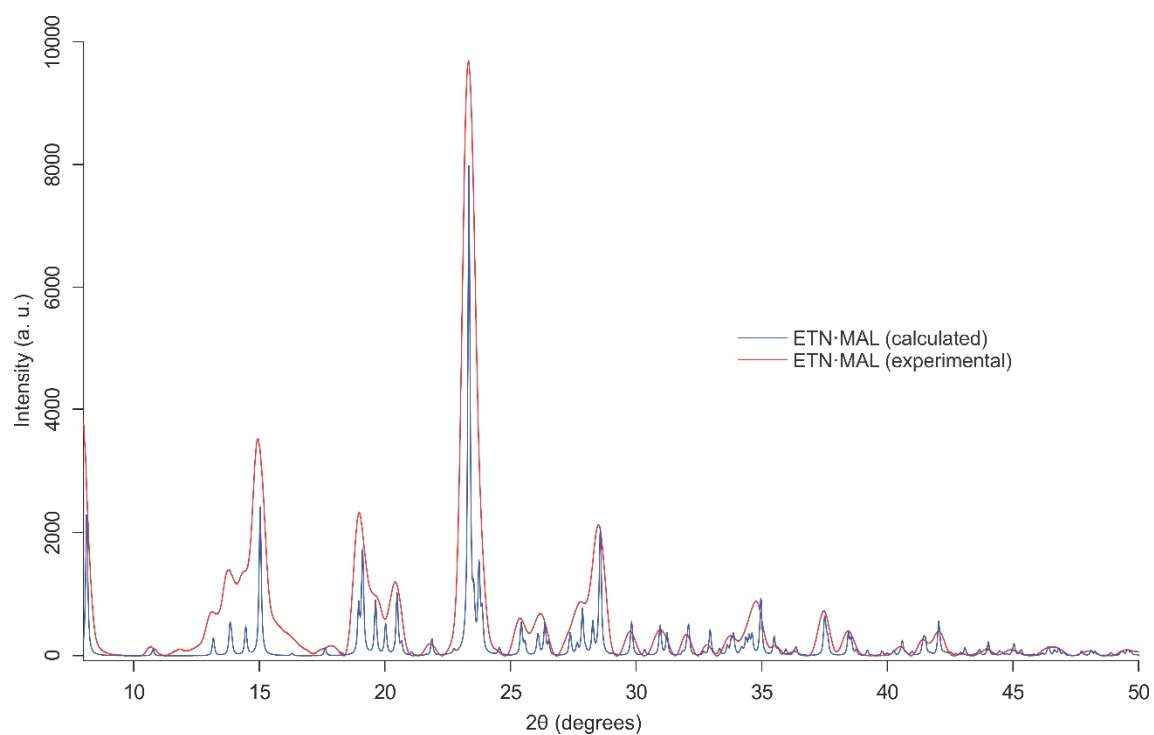

**Figure S7.** Comparison between calculated (blue) and experimental (red) PXRD patterns for ETN·MAL.

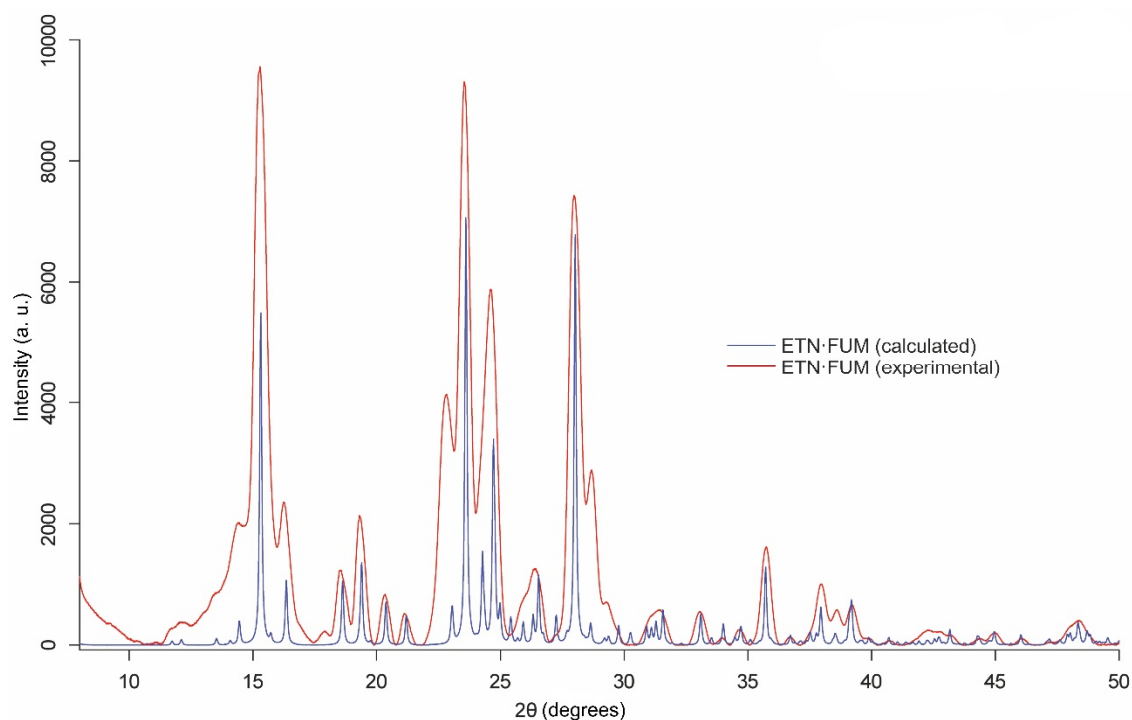

**Figure S8.** Comparison between calculated (blue) and experimental (red) PXRD patterns for ETN·FUM.

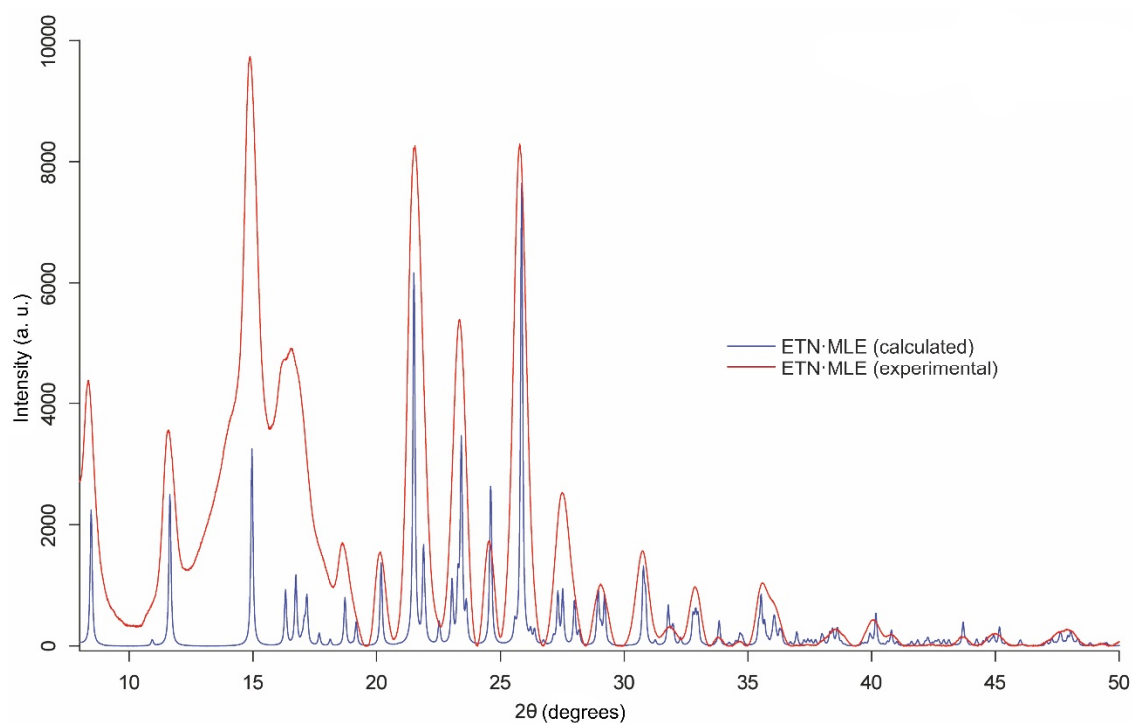

**Figure S9.** Comparison between calculated (blue) and experimental (red) PXRD patterns for ETN·MLE.



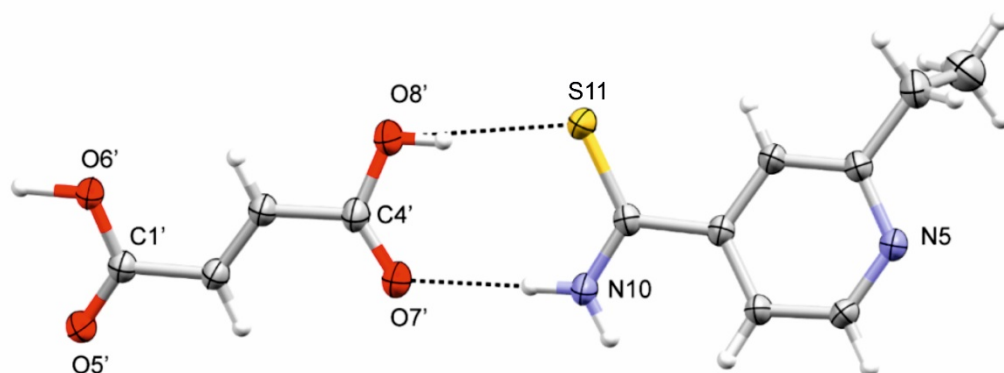

**Figure S10.** Asymmetric unit of ETN-FUM.

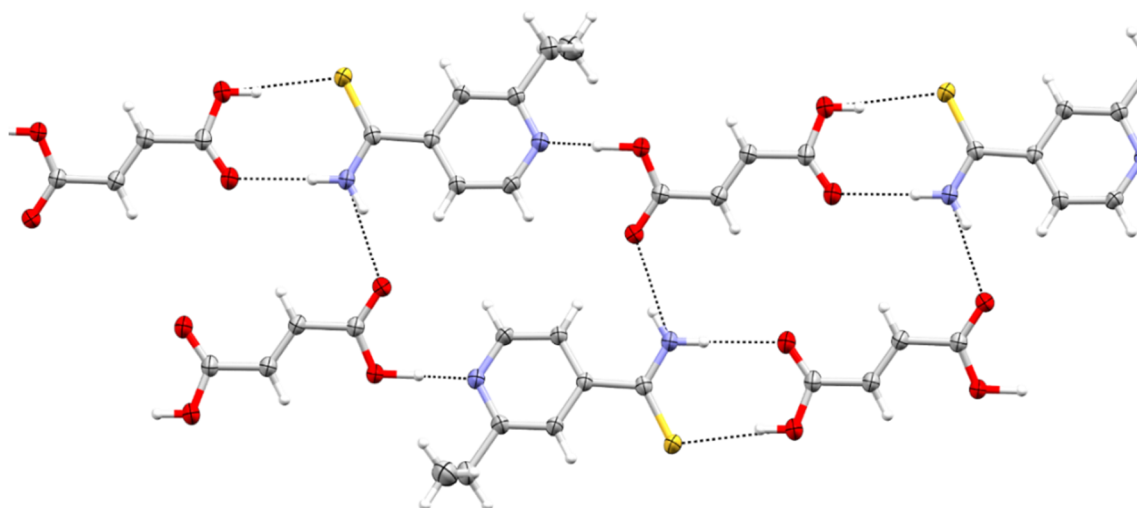

**Figure S11.** HB pattern of ETN-FUM.

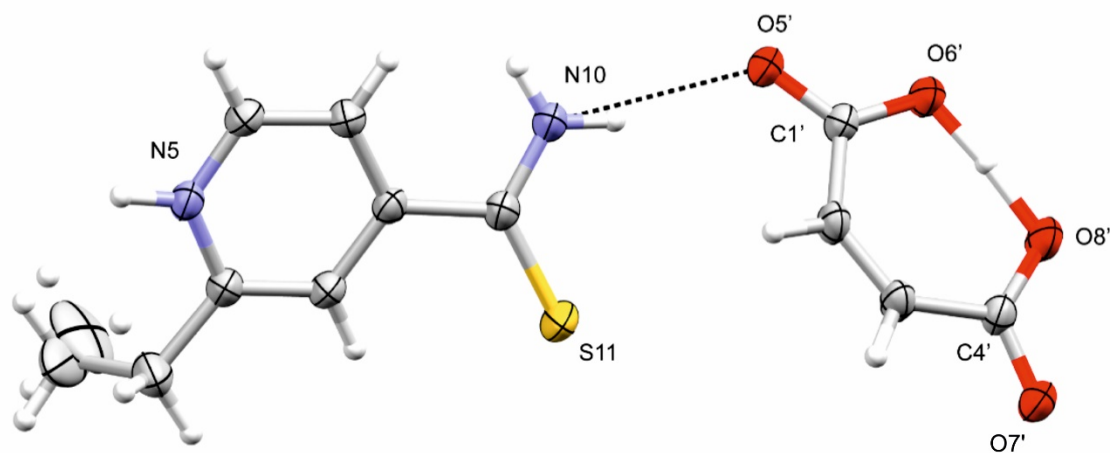

**Figure S12.** Asymmetric unit of ETN·MLE.

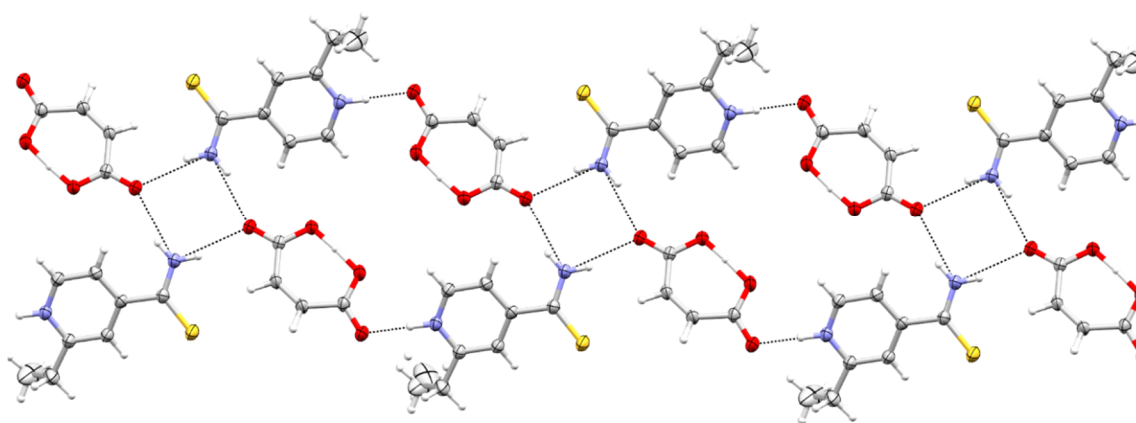

**Figure S13.** HB pattern of ETN·MLE.

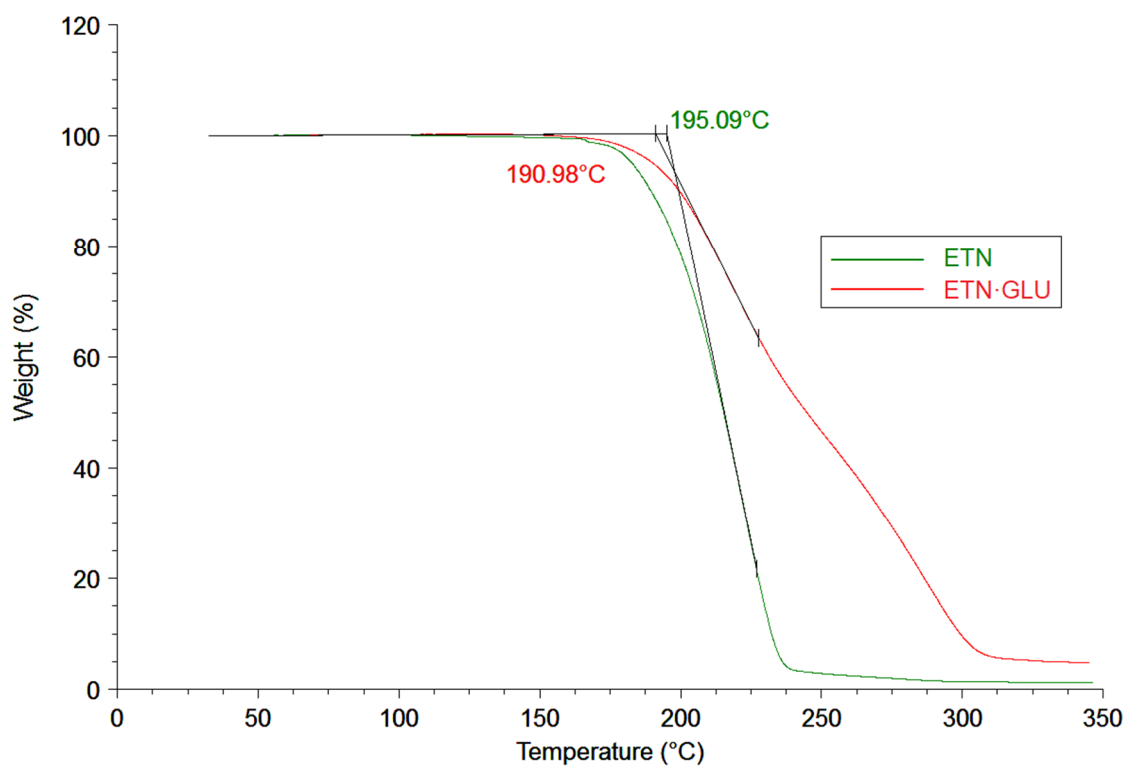

**Figure S14.** Comparison between TGA curves of ETN (green) and ETN·GLU (red).

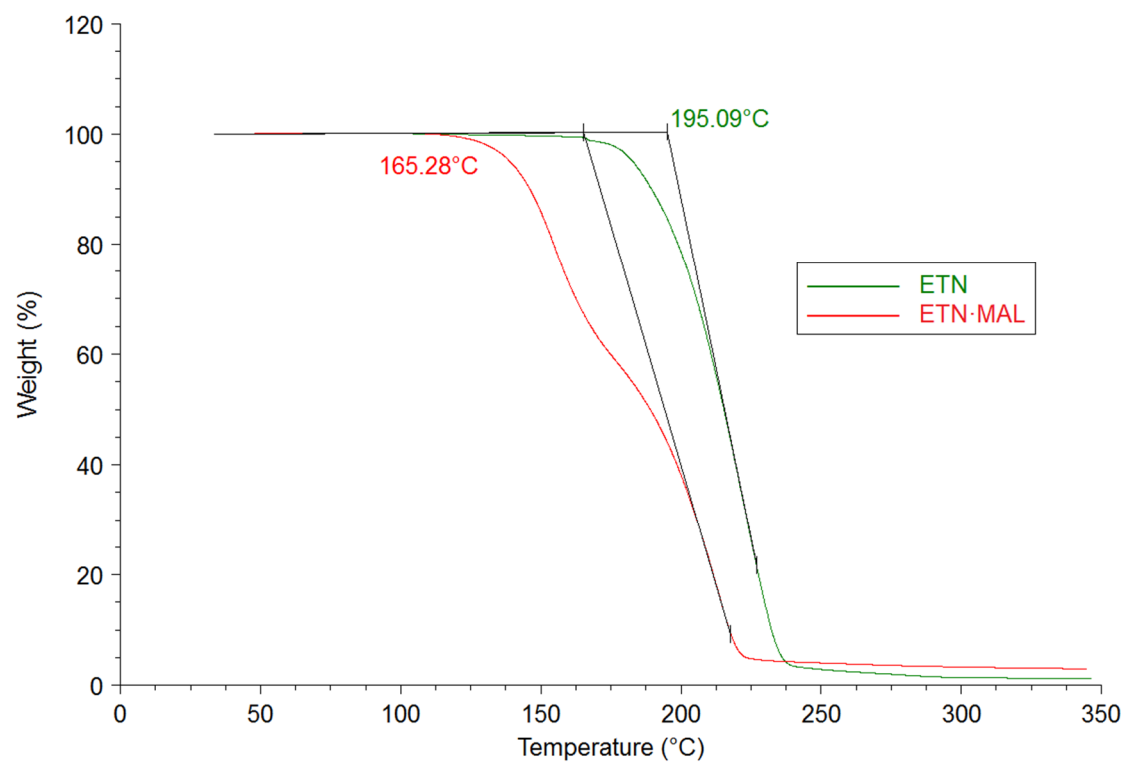

**Figure S15.** Comparison between TGA curves of ETN (green) and ETN·MAL (red).

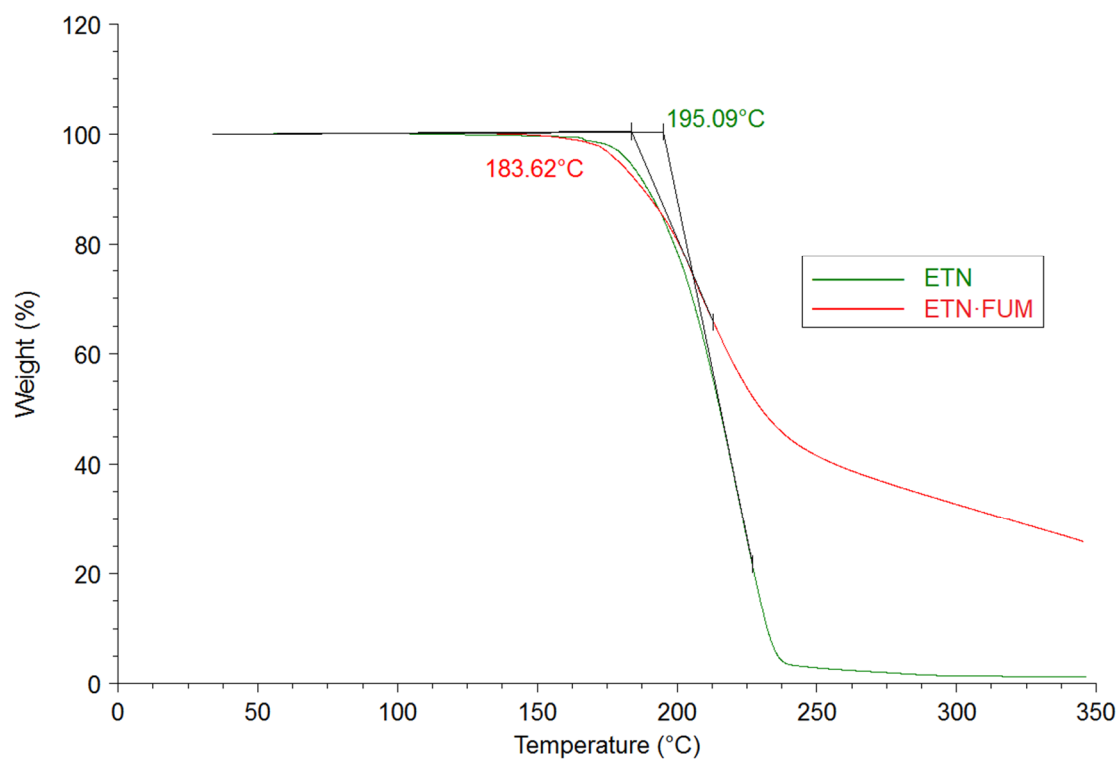

**Figure S16.** Comparison between TGA curves of ETN (green) and ETN·FUM (red).

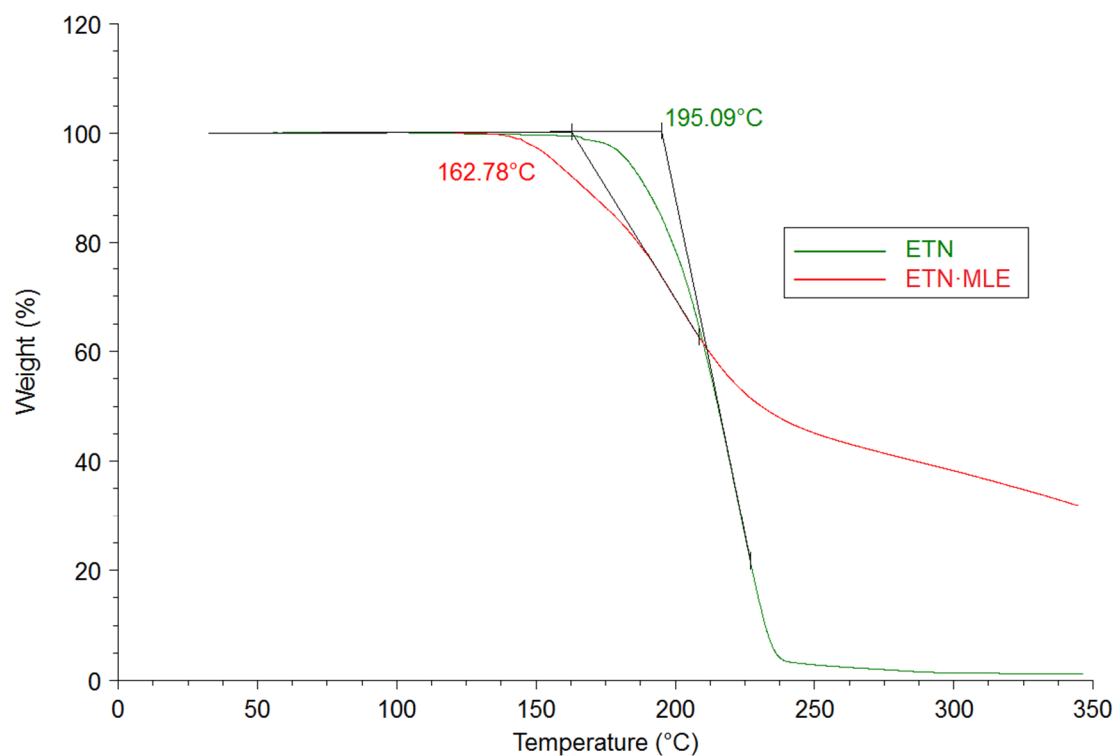

**Figure S17.** Comparison between TGA curves of ETN (green) and ETN·MLE (red).

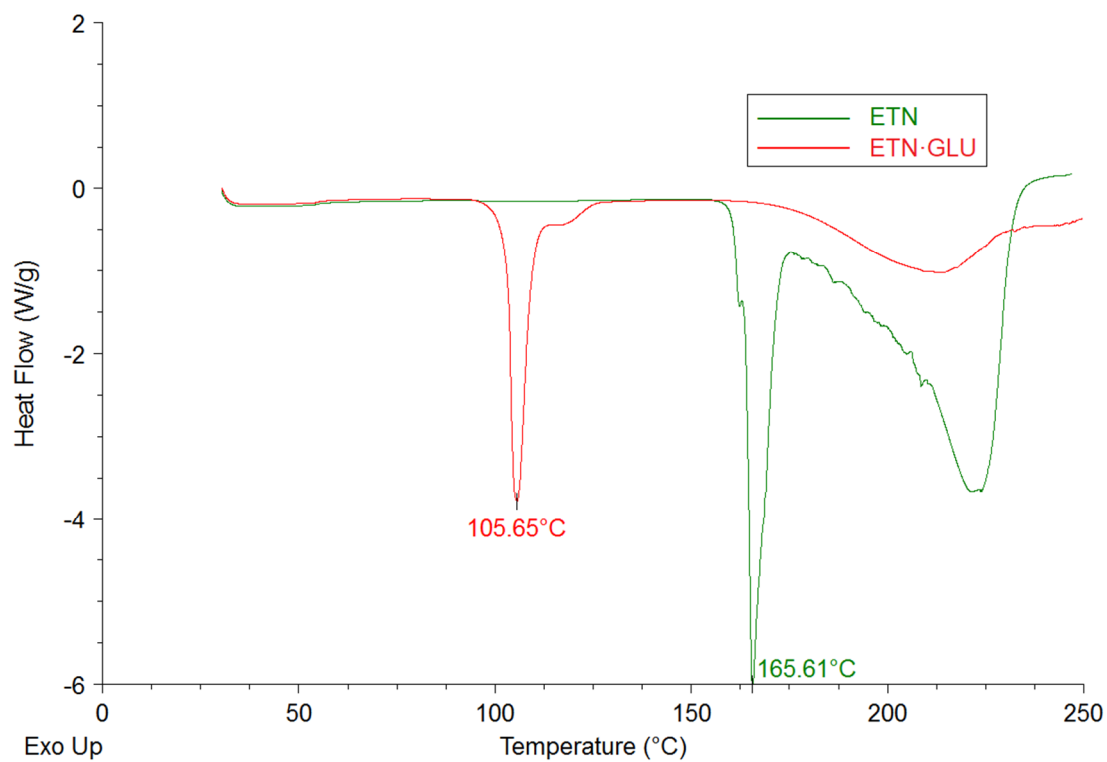

**Figure S18.** Comparison between DSC curves of ETN (green) and ETN·GLU (red).

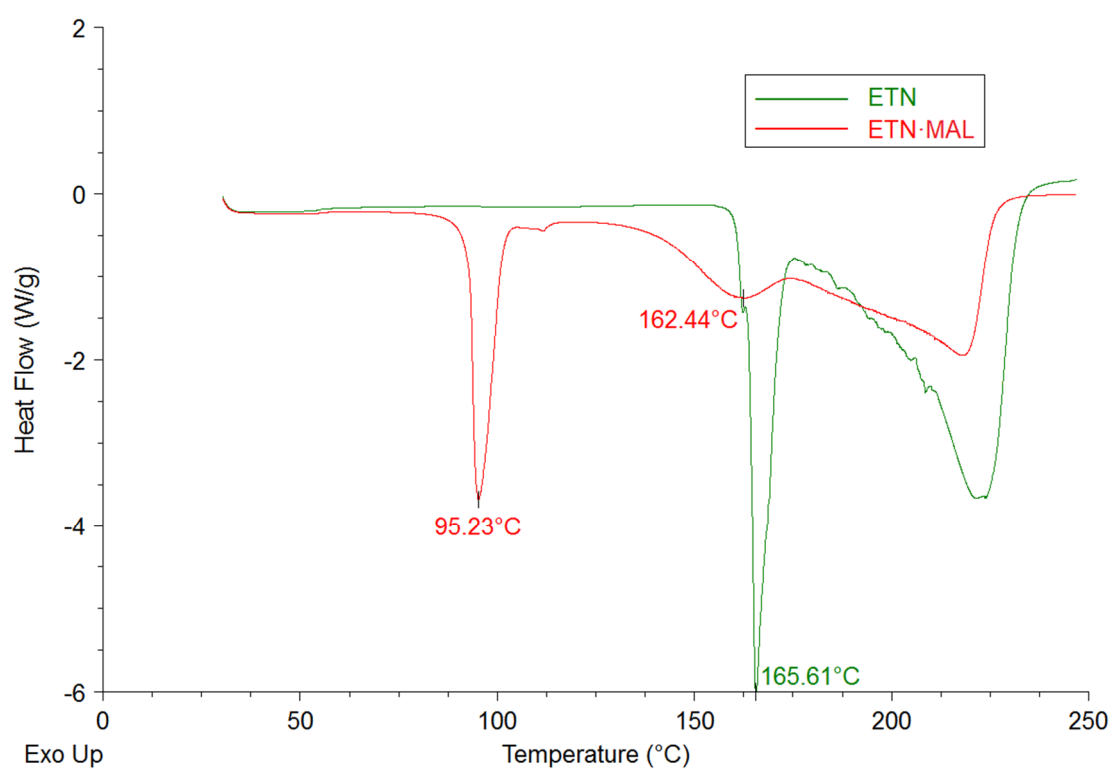

**Figure S19.** Comparison between DSC curves of ETN (green) and ETN·MAL (red).

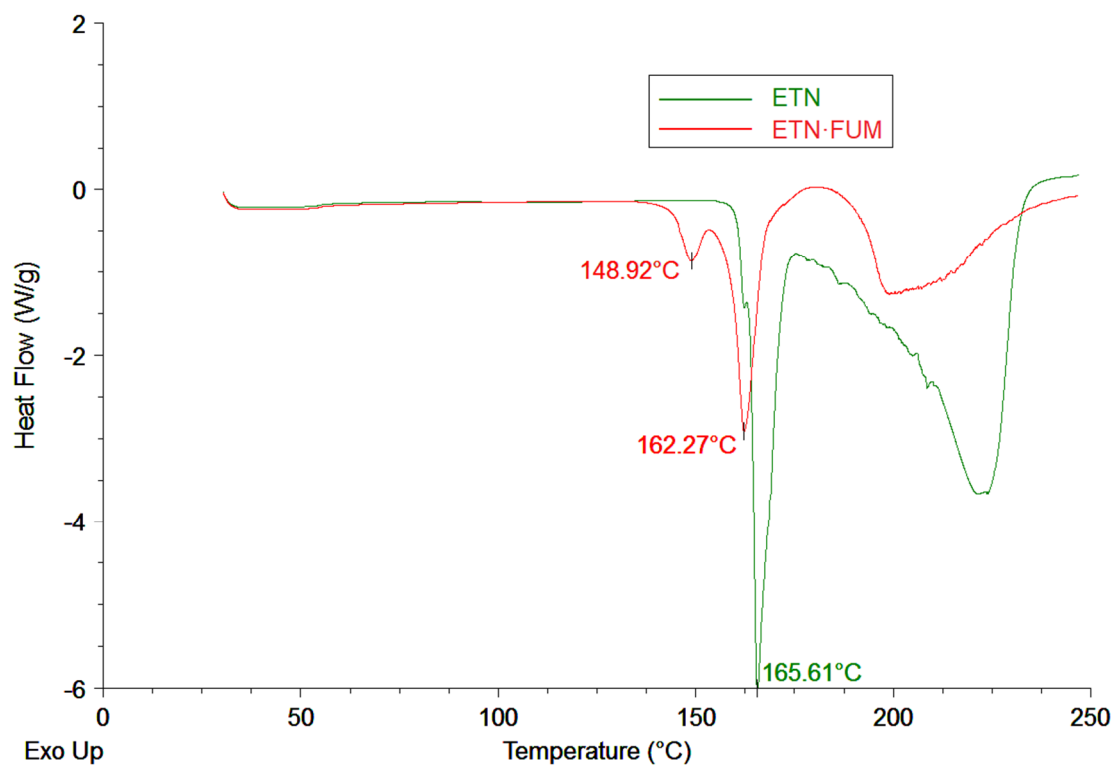

Figure S20. Comparison between DSC curves of ETN (green) and ETN·FUM (red).

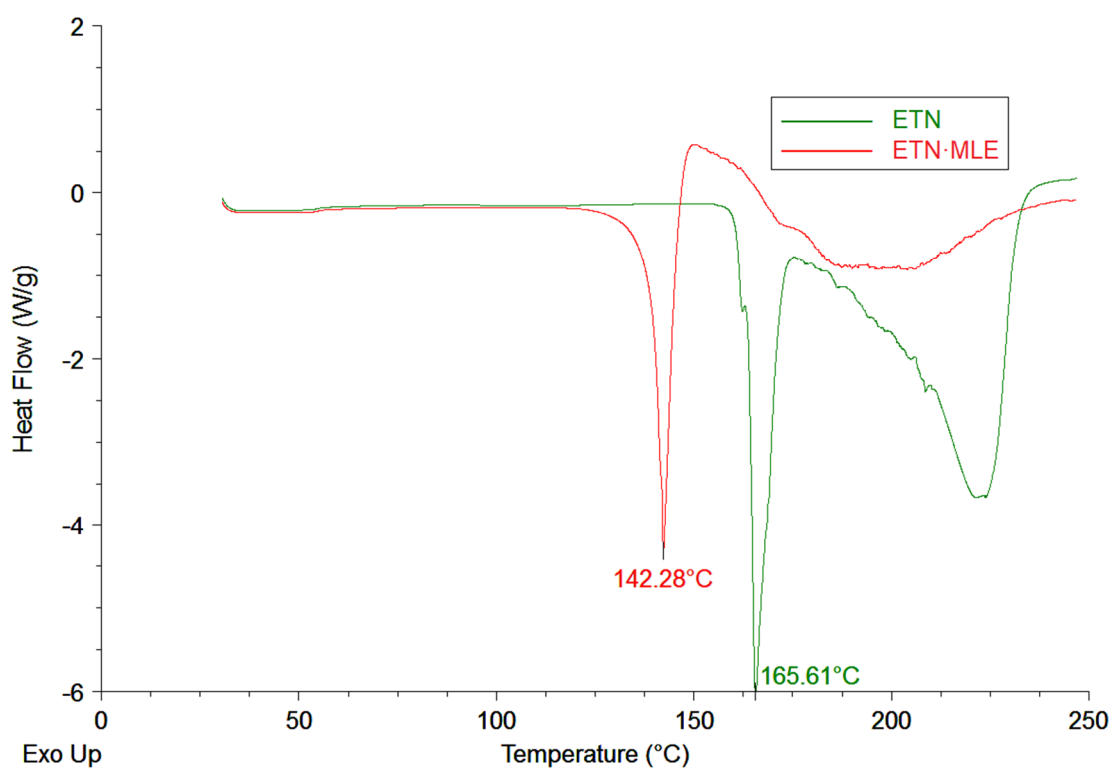

Figure S21. Comparison between DSC curves of ETN (green) and ETN·MLE (red).
